# Supplementary material for: An operationally broadened alkaline water electrolyser enabled by highly stable poly(oxindole biphenylene) ion-solvating membranes
Source: Research Square preprint supplement (doi:10.21203/rs.3.rs-2163104/v1), 2022-10-24
Supplement: Supplementary file 1 [file 645e5b1d0ad316ac30fd8f38.docx]

**Supporting information for**

**An operationally broadened alkaline water electrolyser enabled by highly stable poly(oxindole biphenylene) ion-solvating membranes**

Xu Hu1,2, Bin Hu1,2, Min Liu1,2, Hua Bing Tao3, Yingda Huang1, Shuanyan Kang1, Kang Geng1* and Nanwen Li 1,2*

1 State Key Laboratory of Coal Conversion, Institute of Coal Chemistry, Chinese Academy of Sciences, Taiyuan, 030001, China

2 Center of Materials Science and Optoelectronics Engineering, University of Chinese Academy of Sciences, Beijing, 100049, China

3 State Key Laboratory for Physical Chemistry of Solid Surfaces, Collaborative Innovation Center of Chemistry for Energy Materials, and College of Chemistry and Chemical Engineering, Xiamen University, Xiamen, 361005, China

*Corresponding authors E-mail: [gengkang@sxicc.ac.cn](mailto:gengkang@sxicc.ac.cn); [linanwen@sxicc.ac.cn](mailto:linanwen@sxicc.ac.cn)





**Supplementary Figure 1** 1H NMR spectra of 3,3-diphenylhydroxyindolebefore and after evaluation of the alkaline stability in 8 M aqueous KOH at 80 °C during 700 h. Data were recorded with DMSO-d6 solutions.





**Supplementary Figure 2** 1H NMR spectra of 2-phenylbenzimidazolebefore and after evaluation of the alkaline stability in 8 M aqueous KOH at 80 °C during 700 h. Data were recorded with DMSO-d6 solutions.

**

**

**Supplementary Figure 3** 13C NMR spectra of 2-phenylbenzimidazolebefore and after evaluation of the alkaline stability in 8 M aqueous KOH at 80 °C during 700 h. Data were recorded with DMSO-d6 solutions.

**

**

**Supplementary Figure 4** Storage modulus and tan δ of poly(oxindole biphenylene) (POBP).

**
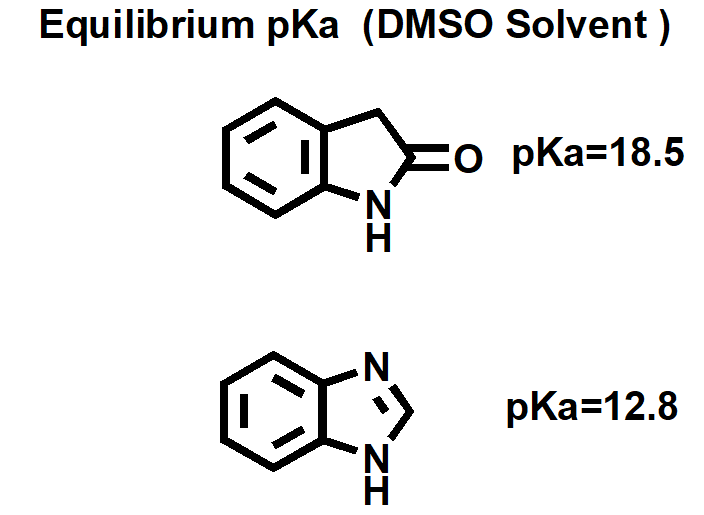
**

**Supplementary Figure 5** The pKa values of oxindole and benzimidazole in DMSO solvent.

**
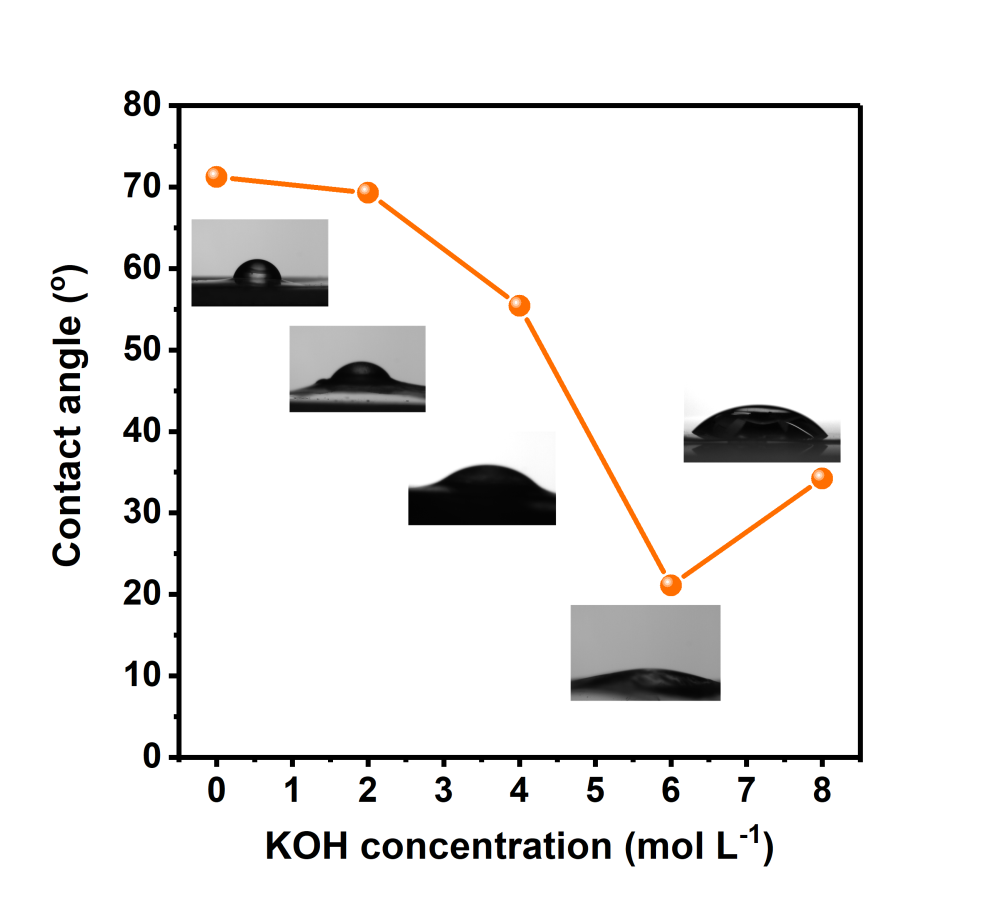
**

**Supplementary Figure 6** Contact angles of POBP doped in bulk KOH of concentrations ranging from 0-8 M.

**
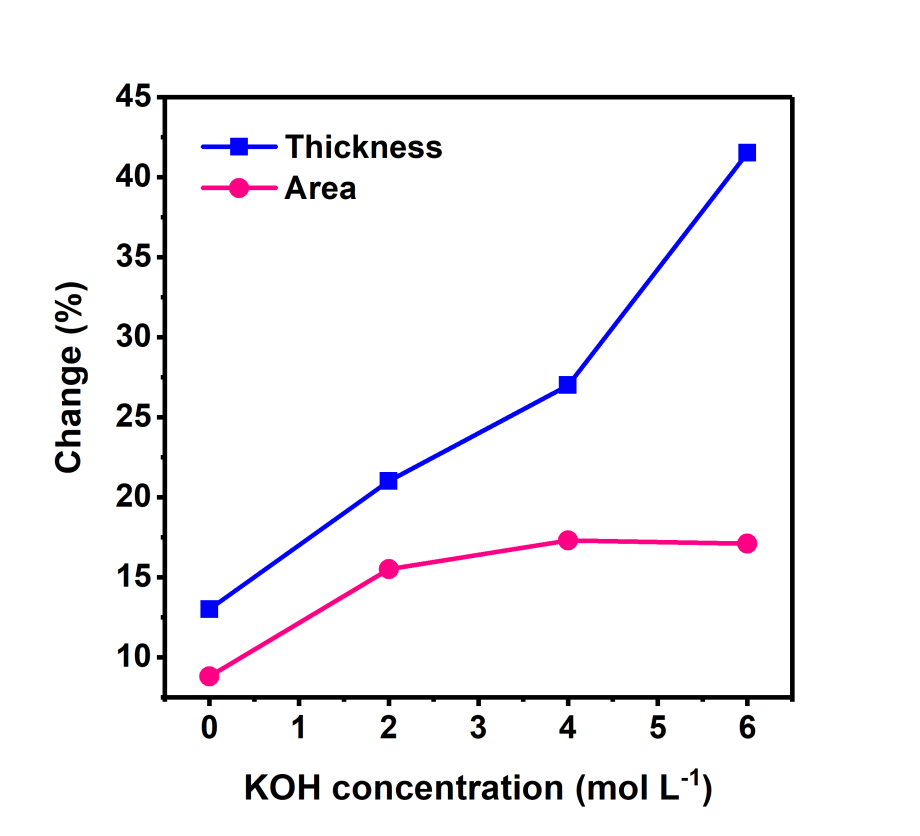
**

**Supplementary Figure 7** Dimensional changes of POBP equilibrated in aqueous bulk KOH solution range from 0-6 M.


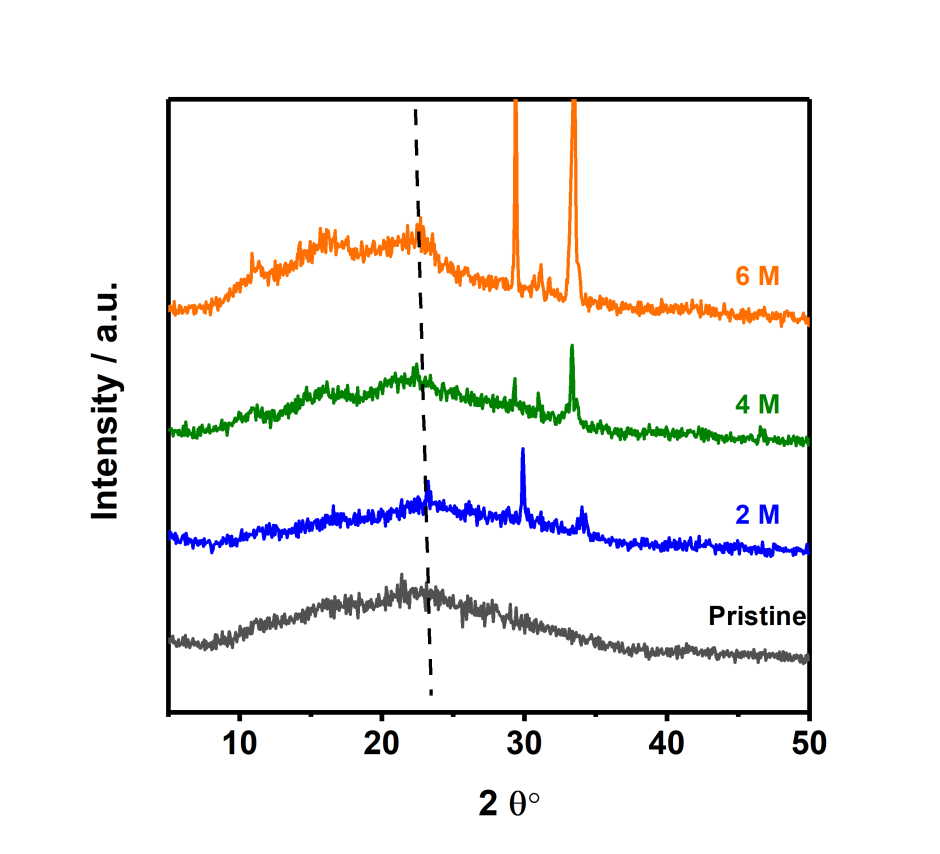


**Supplementary Figure 8** XRD of POBP equilibrated in aqueous bulk KOH solution range from 0-6 M.


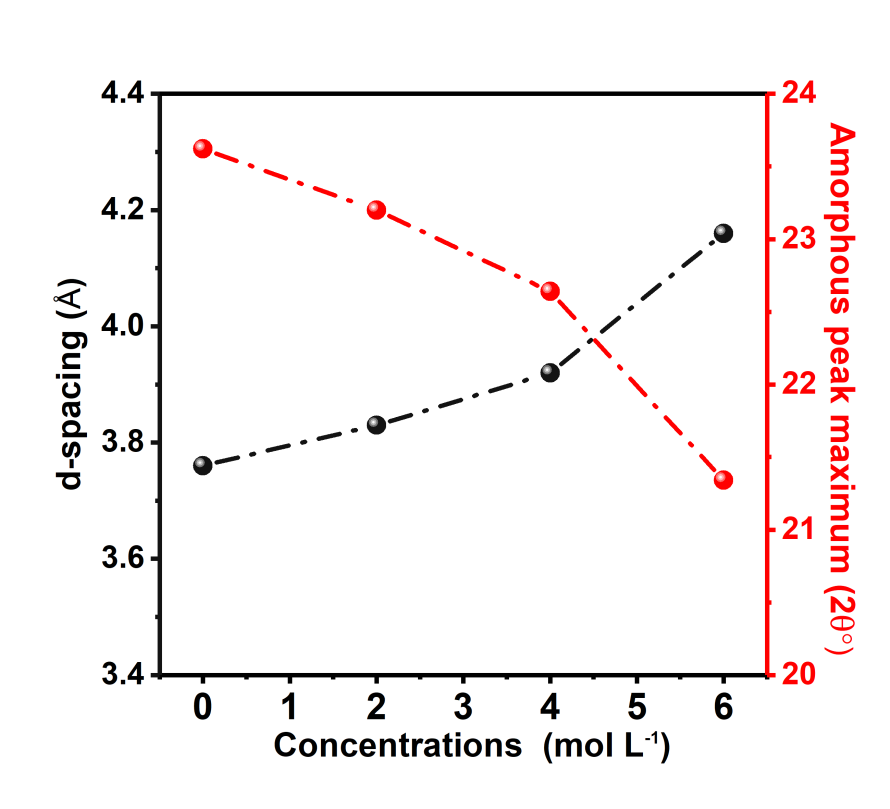


**Supplementary Figure 9** The XRD corresponding 2θº and d-spacing.

**

**

**Supplementary Figure 10** 1H NMR spectra of POBP doped in bulk KOH of concentrations ranging from 0-6 M.

**

**

**Supplementary Figure 11** XPS survey spectra of PIBP doped in bulk KOH of concentrations ranging from 0-6 M.





**Supplementary Figure 12** The corresponding high resolution of N 1s XPS spectra of PIBP equilibrated in aqueous bulk KOH solution range from 0-6 M.





**Supplementary Figure 13** The corresponding high resolution of O 1s XPS spectra of PIBP equilibrated in aqueous bulk KOH solution range from 0-6 M.

**
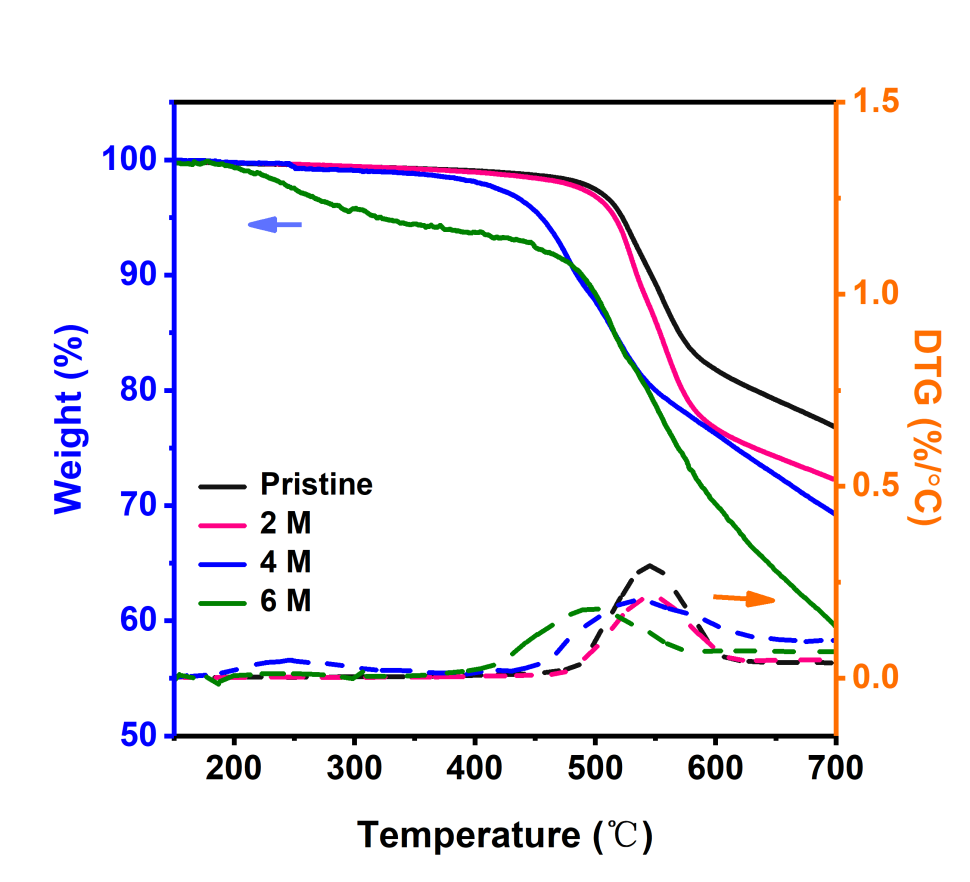
**

**Supplementary Figure 14** TGA and derivative thermogram (DTG) curves of the POBP membranes equilibrated in aqueous bulk KOH solution under N2 at 10 °C/min.

**

**

**Supplementary Figure 15** Arrhenius type behavior between In σ and temperature.


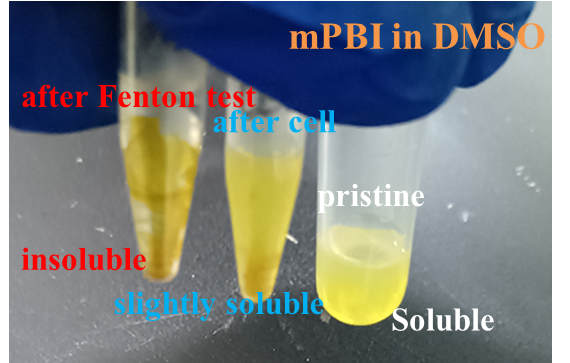


**Supplementary Figure 16** Photo of solubility of pristine and aged mPBI after the different tests.


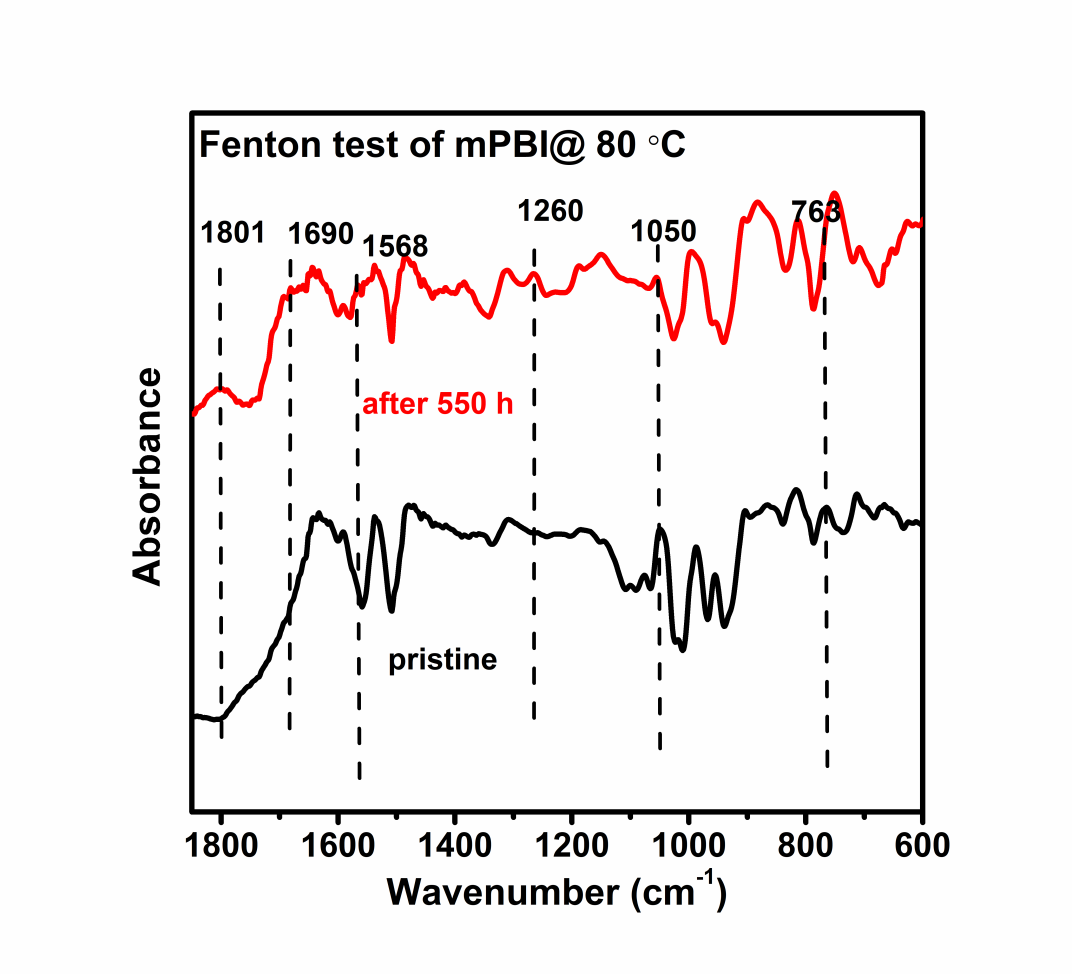


**Supplementary Figure 17** FT-IR spectra of pristine and aged mPBI after Fenton reagent test (4 ppm FeSO4 at 3 wt% H2O2 at 80 °C).


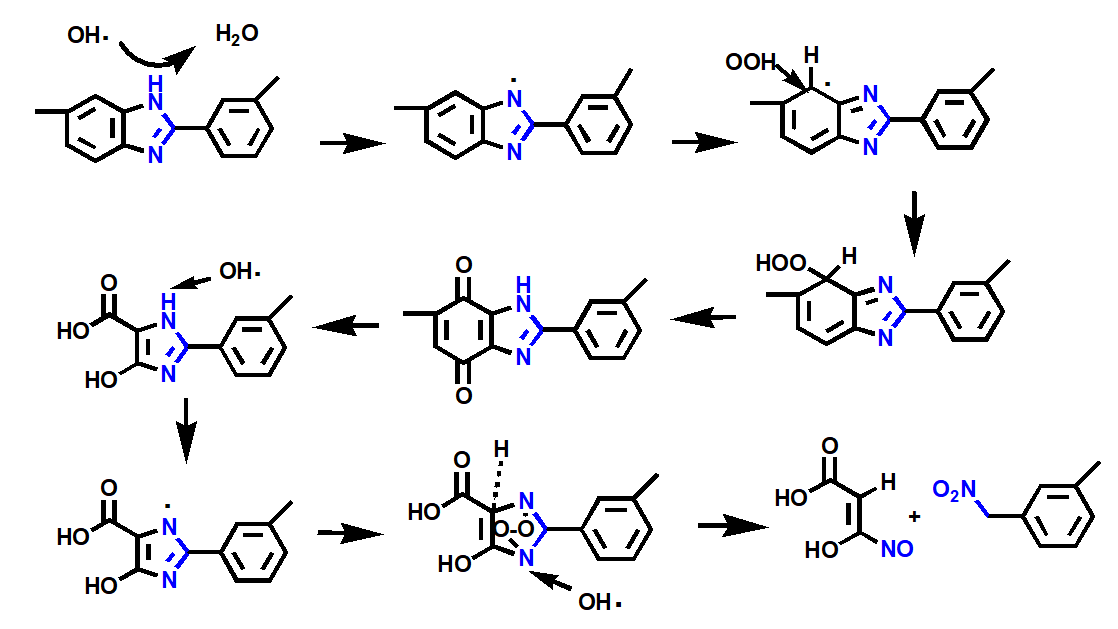


**Supplementary Figure 18** A mechanism of free radical degradationfor degradation of mPBI in Fenton reagent test.


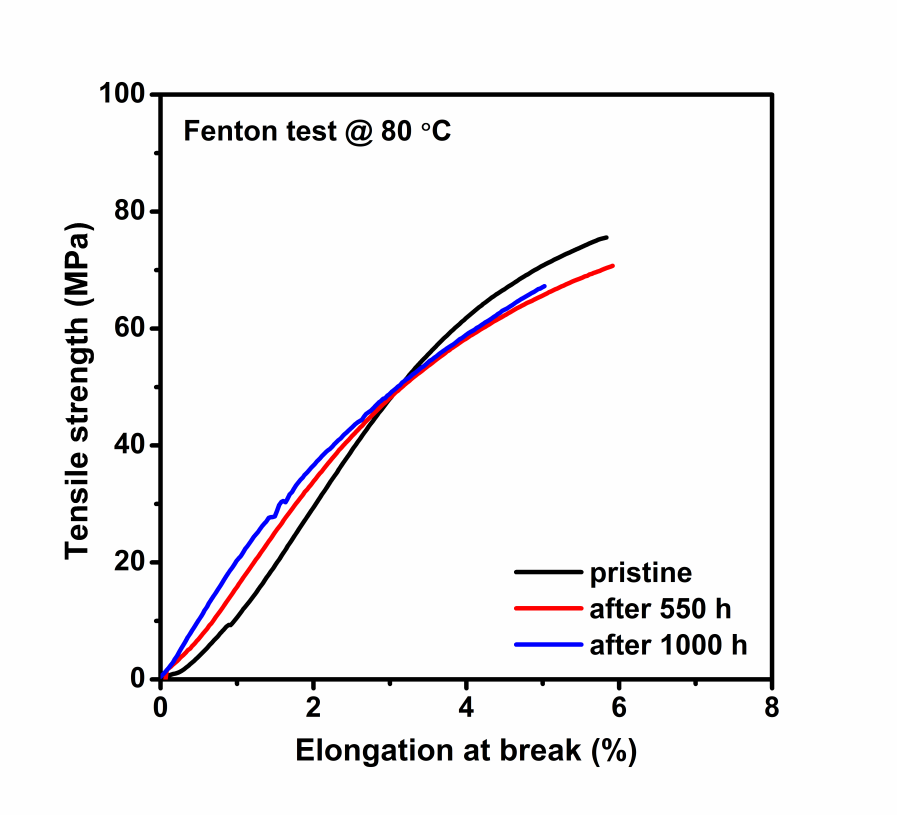


**Supplementary Figure 19** Mechanical propertiesofpristine and aged POBP after Fenton test (4 ppm Fe2+at 3 wt% H2O2 at 80 °C).

**

**

**Supplementary Figure 20** FT-IR spectra ofpristine and aged POBP after Fenton test (4 ppm Fe2+at 3 wt% H2O2 at 80 °C).

**
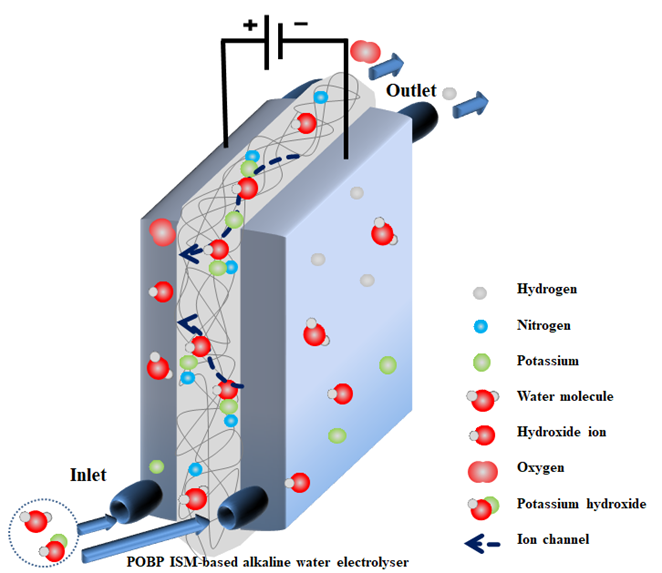
**

**Supplementary Figure 21** Schematic representation of the POBP-ISMs based AWE consisting of PGM-free anode-electrode (Fe-Ni).


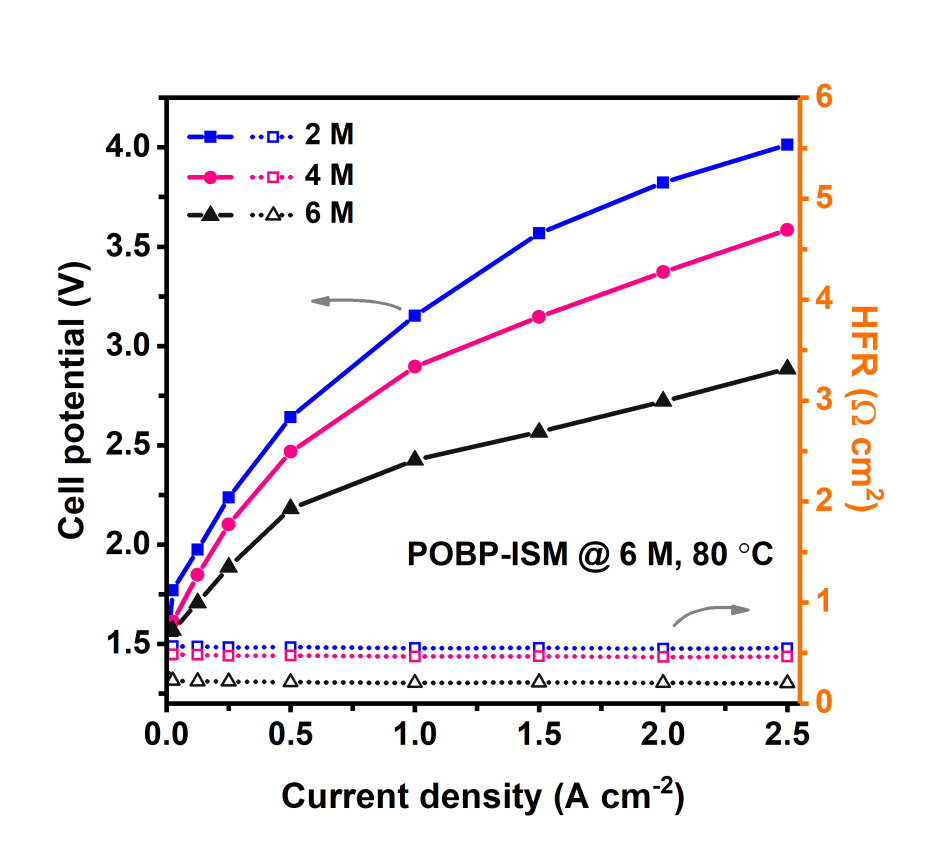


**Supplementary Figure 22** Electrolyser polarization characteristics of POBP at 80 °C with different KOH concentrations with Ni foam as electrode.





**Supplementary Figure 23** Nyquist plots of EIS spectra (0.125 A cm-2) of POBP membrane at 1~6 M KOH with Ni foam as electrode.


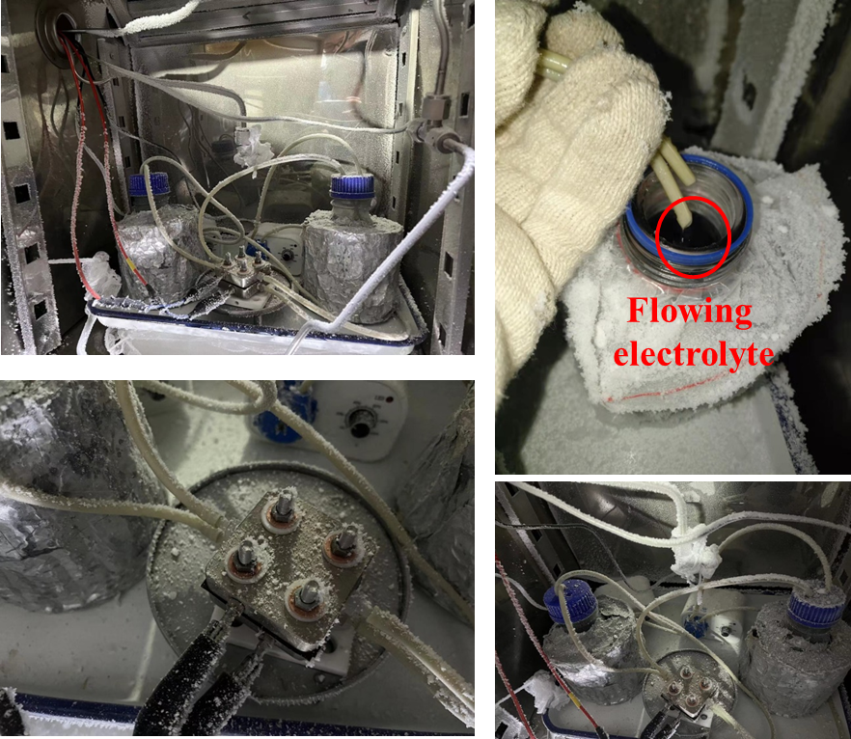


**Supplementary Figure 24** Photograph of the POBP-ISMs based AWE consisting of Ni foam electrode under -35 °C.





**Supplementary Figure 25** Electrolysis polarization characteristics of POBP at -35 ℃ at 6 M KOH concentrations with Ni foam as anode and cathode after different times.





**Supplementary Figure 26** Transient response time ofelectrolysis of POBP at -35 ℃ at 6 M KOH concentrations with Ni foam as anode and cathode after different freezing times.

**
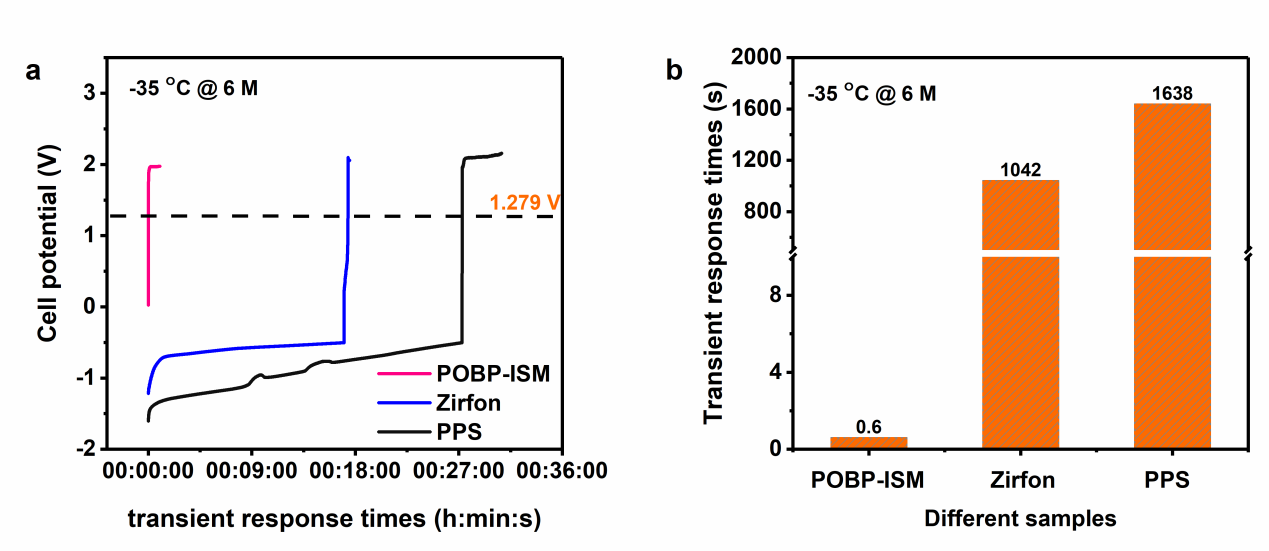
**

**Supplementary Figure 27** Transient response time ofelectrolysis of different membranes (POBP-ISM, Zirfon and PPS) at -35 ℃ at 6 M KOH concentrations with Ni foam as anode and cathode.

**
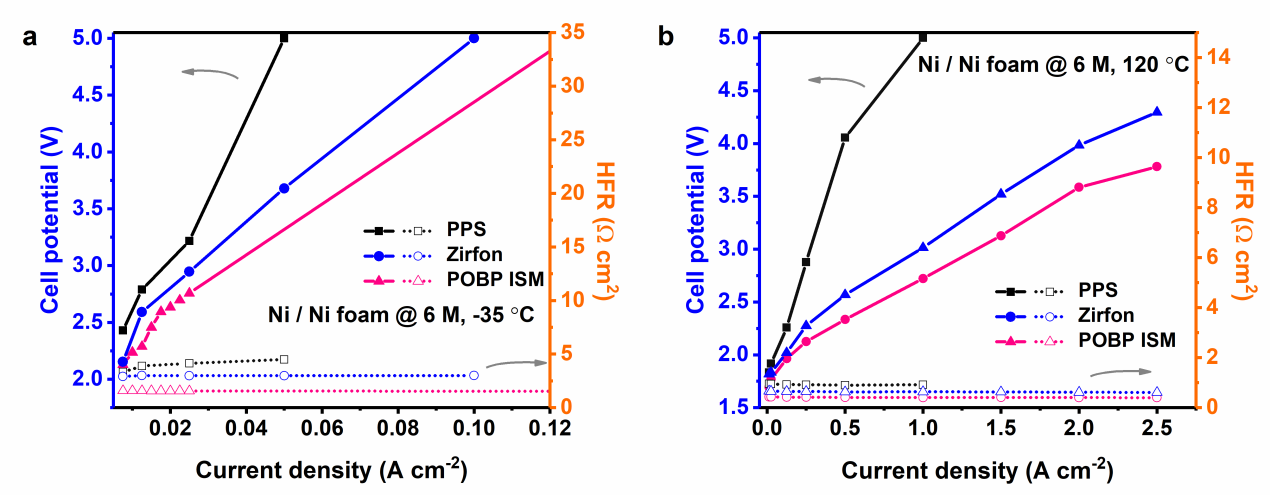
**

**Supplementary Figure 28 a,** Comparison of electrolysis polarization and high-frequency resistance(HFR) consisting of different membranes: Zirfon, POBP-ISM and PPS diaphragm, at -35℃. **b,** Comparison of electrolysis polarization and high-frequency resistance (HFR) consisting of different membranes: Zirfon, POBP-ISM and PPS diaphragm, at 120 ℃.


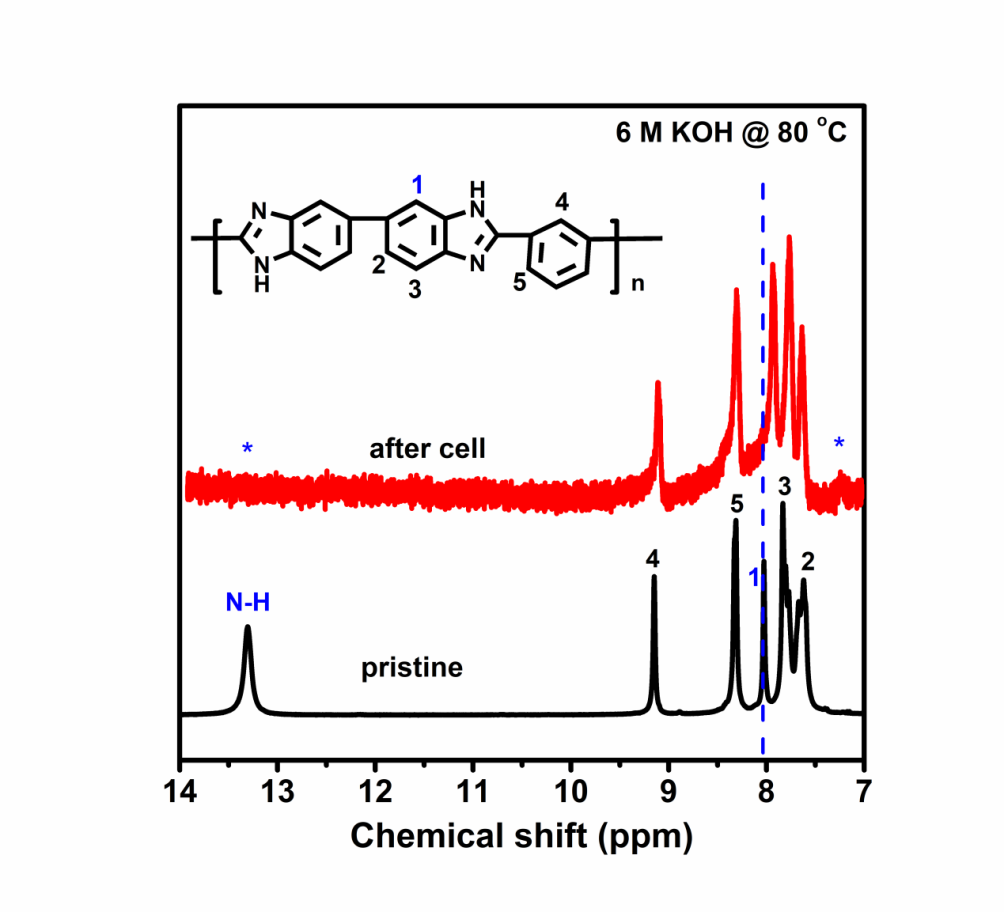


**Supplementary Figure 29** 1H NMR spectrums of pristine and aged PBI after 130 h of in-situ durability.


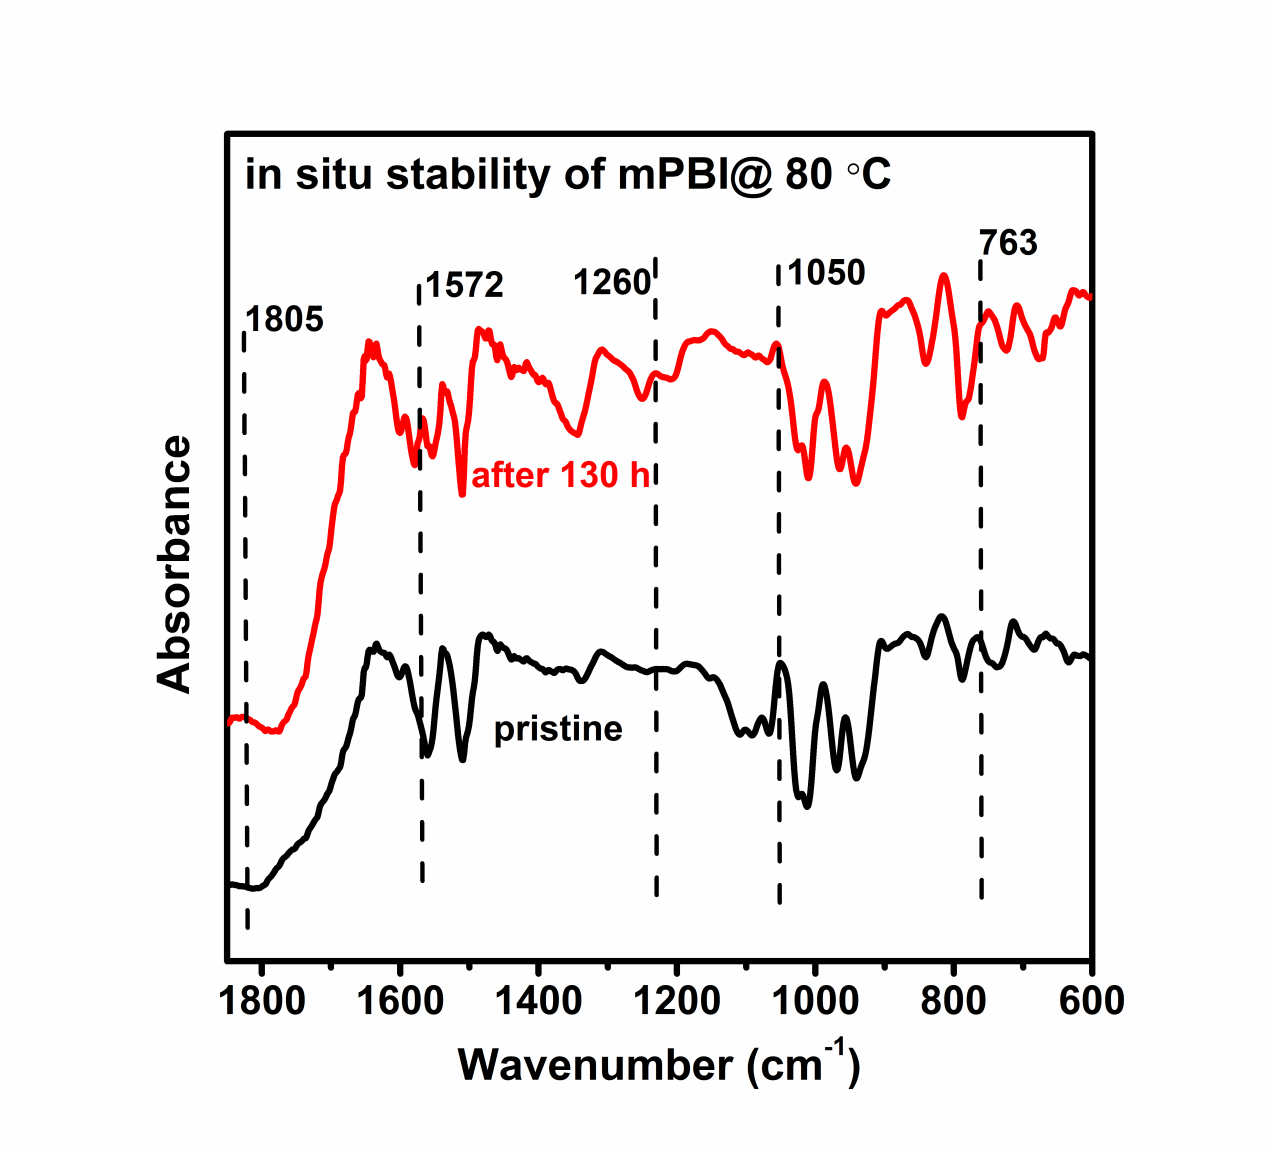


**Supplementary Figure 30** FT-IR spectrums of pristine and aged mPBI after 130 h of in-situ durability.

**

**

**Supplementary Figure 31** 1H NMR spectrums of pristine and aged POBP after 2500 h of in-situ durability.

**

**

**Supplementary Figure 32** 13C NMR spectrums of pristine and aged POBP after 2500 h of in-situ durability.


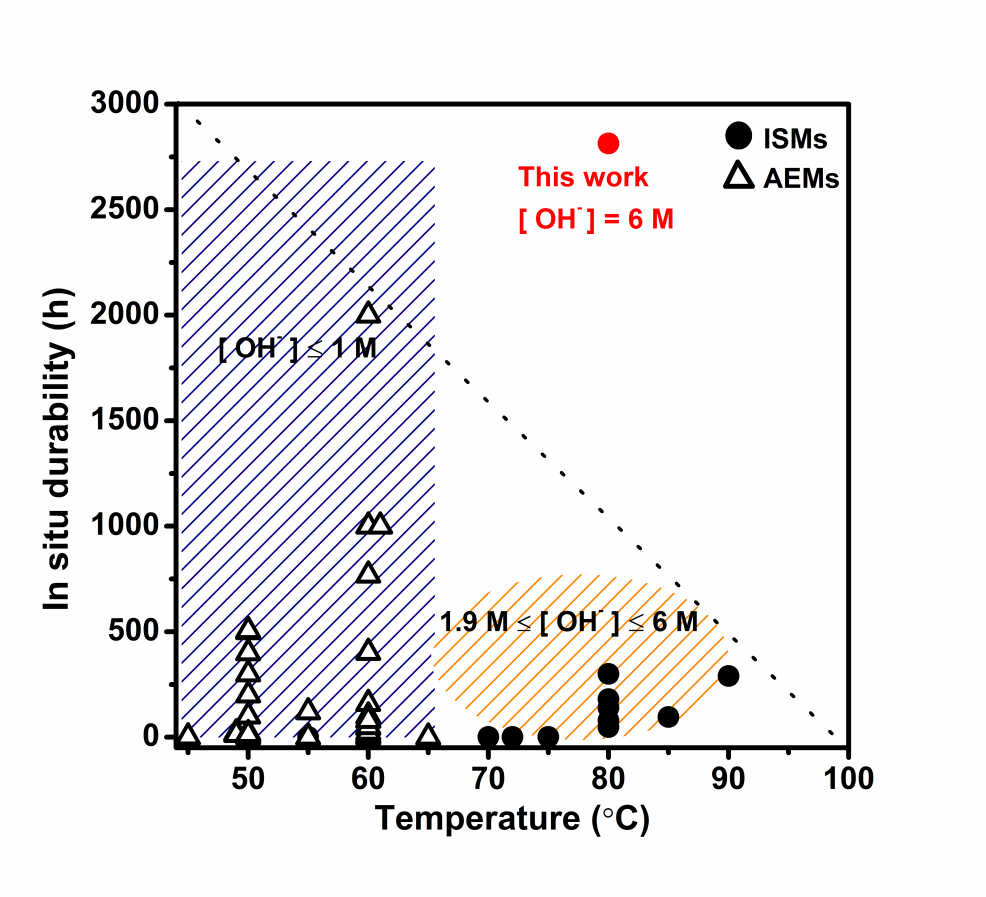


**Supplementary Figure 33** Comparison of in-situ durability and temperature of present POBP-ISM and current ISMs and AEMs. The electrolyteconcentration of reported AWE with membrane was plotted for comparison. Red dot symbols denote the present work based on PIBP-ISMs, hollow black triangle symbols are reported AEMs1-18, and solid black circles are ISMs19-24. The blue diagonal line area is the electrolyte concentration less than or equal to 1 M,orange diagonal line area is the electrolyte concentration between 1.9 and 6 M.

**Supplementary Table 1** More than 60 g of polymerization batcha results for polymers based on isatin and biphenylene.

| entry | medium  (w/w) | reaction time(h) | yield  (%) | inherent viscosity ηinh (dL g−1) |
| --- | --- | --- | --- | --- |
| 1 | 100% TFSA | 8 | 0 | gel |
| 2 | 95% TFSA-5% TFA | 8 | 0 | gel |
| 3 | 90% TFSA-10% TFA | 8 | 82 | partial gel |
| 4 | 80% TFSA-20% TFA | 8 | 99 | 2.20 |
| 5 | 70% TFSA-30% TFA | 24 | 89 | 1.65 |
| 6 | 50% TFSA-50% TFA | 24 | 85 | 1.06 |
| 7 | 100% TFA | 72 | 0 | 0 |

aother conditions: isatin/ biphenylene (mol/mol)=1.12, temperature: 0°C.

The intrinsic viscosity (η) of the polymer was determined using provirous method25,26. The reduced (ηred) and inherent (ηinh) viscosities were calculated as:

where t1 is the efflux time for the polymer solution with concentration c and t2is the efflux time for a blank sample. Extrapolating ηred and ηinh to c = 0 and computing the average intersection with the y-axis yielded the intrinsic viscosity.

**Supplementary Table 2** Solubilitya of the HMW poly(isatin biphenylene) polymers (POBP).

| Sample | Solubility | | | | | | | | |
| --- | --- | --- | --- | --- | --- | --- | --- | --- | --- |
| CH3CH2OH | CHCl3 | H2O | THF | Acetone | NMP | DMF | DMSO | DMAc |
| PIBP | – | – | – | – | – | +++ | +++ | +++ | +++ |

a+ soluble, – insoluble

**References**

1 Cha, M. S. *et al.* Poly(carbazole)-based anion-conducting materials with high performance and durability for energy conversion devices. *Energy & Environmental Science* **13**, 3633-3645, doi:10.1039/d0ee01842b (2020).

2 Chen, N. *et al.* High-performance anion exchange membrane water electrolyzers with a current density of 7.68 A cm-2 and durability of 1000 h. *Energy & Environmental Science* **14**, 6338–6348, doi:10.1039/d1ee02642a (2021).

3 Chu, X., Shi, Y., Liu, L., Huang, Y. & Li, N. Piperidinium-functionalized anion exchange membranes and their application in alkaline fuel cells and water electrolysis. *Journal of Materials Chemistry A* **7**, 7717-7727, doi:10.1039/c9ta01167f (2019).

4 Fortin, P. *et al.* High-performance alkaline water electrolysis using Aemion™ anion exchange membranes. *J. Power Sources* **451**, 227814, doi:10.1016/j.jpowsour.2020.227814 (2020).

5 Hu, X. *et al.* Piperidinium functionalized aryl ether-free polyaromatics as anion exchange membrane for water electrolysers: Performance and durability. *Journal of Membrane Science* **621**, 118964, doi:10.1016/j.memsci.2020.118964 (2021).

6 Lee, H. I. *et al.* Advanced Zirfon-type porous separator for a high-rate alkaline electrolyser operating in a dynamic mode. *Journal of Membrane Science* **616**, 118541, doi:10.1016/j.memsci.2020.118541 (2020).

7 Li, D. *et al.* Phenyl Oxidation Impacts the Durability of Alkaline Membrane Water Electrolyzer. *ACS Appl Mater Interfaces* **11**, 9696-9701, doi:10.1021/acsami.9b00711 (2019).

8 Li, D. *et al.* Durability of Anion Exchange Membrane Water Electolyzers. *Energy & Environmental Science* **14**, 3393, doi:10.1039/d0ee04086j (2021).

9 Li, D. *et al.* Highly quaternized polystyrene ionomers for high performance anion exchange membrane water electrolysers. *Nature Energy* **5**, 378-385, doi:10.1038/s41560-020-0577-x (2020).

10 Li, H. *et al.* Poly(vinyl benzyl methylpyrrolidinium) hydroxide derived anion exchange membranes for water electrolysis. *Journal of Materials Chemistry A* **7**, 17914-17922, doi:10.1039/c9ta04868e (2019).

11 Motz, A. R. *et al.* Performance and durability of anion exchange membrane water electrolyzers using down-selected polymer electrolytes. *Journal of Materials Chemistry A* **9**, 22670, doi:10.1039/d1ta06869e (2021).

12 Najibah, M. *et al.* PBI nanofiber mat-reinforced anion exchange membranes with covalently linked interfaces for use in water electrolysers. *Journal of Membrane Science* **640**, 119832, doi:10.1016/j.memsci.2021.119832 (2021).

13 Park, H. J., Lee, S. Y., Lee, T. K., Kim, H.-J. & Lee, Y. M. N3-butyl imidazolium-based anion exchange membranes blended with Poly(vinyl alcohol) for alkaline water electrolysis. *Journal of Membrane Science* **611**, 118355, doi:10.1016/j.memsci.2020.118355 (2020).

14 Park, Y. S. *et al.* Superior performance of anion exchange membrane water electrolyzer: ensemble of producing oxygen vacancies and controlling mass transfer resistance. *Applied Catalysis B: Environmental* **278**, 119276, doi:10.1016/j.apcatb.2020.119276 (2020).

15 Su, X. *et al.* Novel piperidinium functionalized anionic membrane for alkaline polymer electrolysis with excellent electrochemical properties. *Journal of Membrane Science* **581**, 283-292, doi:10.1016/j.memsci.2019.03.072 (2019).

16 Vengatesan, S., Santhi, S., Jeevanantham, S. & Sozhan, G. Quaternized poly (styrene-co-vinylbenzyl chloride) anion exchange membranes for alkaline water electrolysers. *J. Power Sources* **284**, 361-368, doi:10.1016/j.jpowsour.2015.02.118 (2015).

17 Wan, L., Xu, Z. & Wang, B. Green preparation of highly alkali-resistant PTFE composite membranes for advanced alkaline water electrolysis. *Chem. Eng. J.* **426**, 131340, doi:10.1016/j.cej.2021.131340 (2021).

18 Xu, Z. *et al.* Anisotropic anion exchange membranes with extremely high water uptake for water electrolysis and fuel cell. *Journal of Materials Chemistry A* **9**, 23485, doi:10.1039/d1ta06579c (2021).

19 Aili, D., Kraglund, M. R., Tavacoli, J., Chatzichristodoulou, C. & Jensen, J. O. Polysulfone-polyvinylpyrrolidone blend membranes as electrolytes in alkaline water electrolysis. *Journal of Membrane Science* **598**, 117674, doi:10.1016/j.memsci.2019.117674 (2020).

20 Aili, D. *et al.* Towards a stable ion-solvating polymer electrolyte for advanced alkaline water electrolysis. *Journal of Materials Chemistry A* **5**, 5055-5066, doi:10.1039/c6ta10680c (2017).

21 Diaz, L. A. *et al.* Alkali-doped polyvinyl alcohol – Polybenzimidazole membranes for alkaline water electrolysis. *Journal of Membrane Science* **535**, 45-55, doi:10.1016/j.memsci.2017.04.021 (2017).

22 Hu, B. *et al.* A stable ion-solvating PBI electrolyte enabled by sterically bulky naphthalene for alkaline water electrolysis. *Journal of Membrane Science* **643**, 120042, doi:10.1016/j.memsci.2021.120042 (2022).

23 Konovalova, A. *et al.* Blend membranes of polybenzimidazole and an anion exchange ionomer (FAA3) for alkaline water electrolysis: Improved alkaline stability and conductivity. *Journal of Membrane Science* **564**, 653-662, doi:10.1016/j.memsci.2018.07.074 (2018).

24 Kraglund, M. R. *et al.* Zero-Gap Alkaline Water Electrolysis Using Ion-Solvating Polymer Electrolyte Membranes at Reduced KOH Concentrations. *J. Electrochem. Soc.* **163**, F3125-F3131, doi:10.1149/2.0161611jes (2016).

25 Chen, N. *et al.* Poly(fluorenyl aryl piperidinium) membranes and ionomers for anion exchange membrane fuel cells. *Nat Commun* **12**, 2367, doi:10.1038/s41467-021-22612-3 (2021).

26 Wang, J. *et al.* Poly(aryl piperidinium) membranes and ionomers for hydroxide exchange membrane fuel cells. *Nature Energy* **4**, 392-398, doi:10.1038/s41560-019-0372-8 (2019).
